# Supplementary material
Source: Springer Nature journal article supplement (https://www.springermedizin.de/resource/supplementary/12904_2008_52_MOESM1_ESM.pdf/9518016)
Supplement: MOESM1 [file 9518016]

Table 1: Characteristics of the reported deaths, overall, per type of LTC and according to the presence of a diagnosis of cancer

|                         | <b>TOTAL</b> |      | <b>LTC</b>            |      |                         |        | <b>CANCER</b> |      |           |        |
|-------------------------|--------------|------|-----------------------|------|-------------------------|--------|---------------|------|-----------|--------|
|                         |              |      | <b>NH<sup>°</sup></b> |      | <b>HHS<sup>°°</sup></b> |        | <b>Yes</b>    |      | <b>No</b> |        |
|                         | N            | %    | N                     | %    | N                       | %      | N             | %    | N         | %      |
| <b>Gender</b>           |              |      |                       |      |                         |        |               |      |           |        |
| Male                    | 508          | 44.5 | 210                   | 35.8 | 298                     | 53.8** | 185           | 57.3 | 295       | 38.4** |
| Female                  | 633          | 55.5 | 377                   | 64.2 | 256                     | 46.2   | 138           | 42.7 | 473       | 61.6   |
| <b>Age</b>              |              |      |                       |      |                         |        |               |      |           |        |
| 16-64 years old         | 87           | 7.4  | 21                    | 3.4  | 66                      | 11.8** | 47            | 14.2 | 37        | 4.7**  |
| 64-85 years old         | 492          | 41.7 | 190                   | 30.7 | 302                     | 53.9   | 195           | 59.1 | 277       | 34.8   |
| >85 years old           | 601          | 50.9 | 409                   | 66.0 | 192                     | 34.3   | 88            | 26.7 | 482       | 60.6   |
| <b>Cancer</b>           |              |      |                       |      |                         |        |               |      |           |        |
| Yes                     | 333          | 29.1 | 93                    | 15.4 | 240                     | 44.5** | /             | /    | /         | /      |
| No                      | 810          | 70.9 | 511                   | 84.6 | 299                     | 55.5   | /             | /    | /         | /      |
| <b>Mental disorders</b> |              |      |                       |      |                         |        |               |      |           |        |
| Yes                     | 324          | 30.5 | 212                   | 36.7 | 112                     | 23.1** | 61            | 20.3 | 247       | 34.5** |
| No                      | 739          | 69.5 | 365                   | 63.3 | 374                     | 77.0   | 239           | 79.7 | 469       | 65.5   |

\*= <0.05, \*\* = <0.001

<sup>°</sup>=nursing homes

<sup>°°</sup>=home health services
